# Supplementary material for: Integrated Profiles of Transcriptome and mRNA m6A Modification Reveal the Intestinal Cytotoxicity of Aflatoxin B1 on HCT116 Cells
Source: MDPI journal article supplement (doi:10.3390/genes14010079), 2022-12-27
Supplement: s1 [file s1]

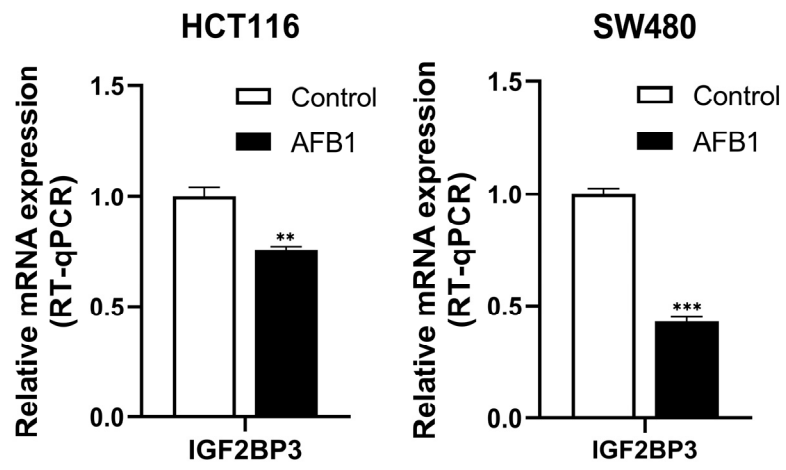

**Figure S1.** The mRNA expression levels of IGF2BP3 in AFB1-treated HCT116 and SW480 cells. Data were expressed as mean  $\pm$  SEM,  $n=3$ . \*\* $p < 0.01$ , \*\*\* $p < 0.0001$  versus the control.

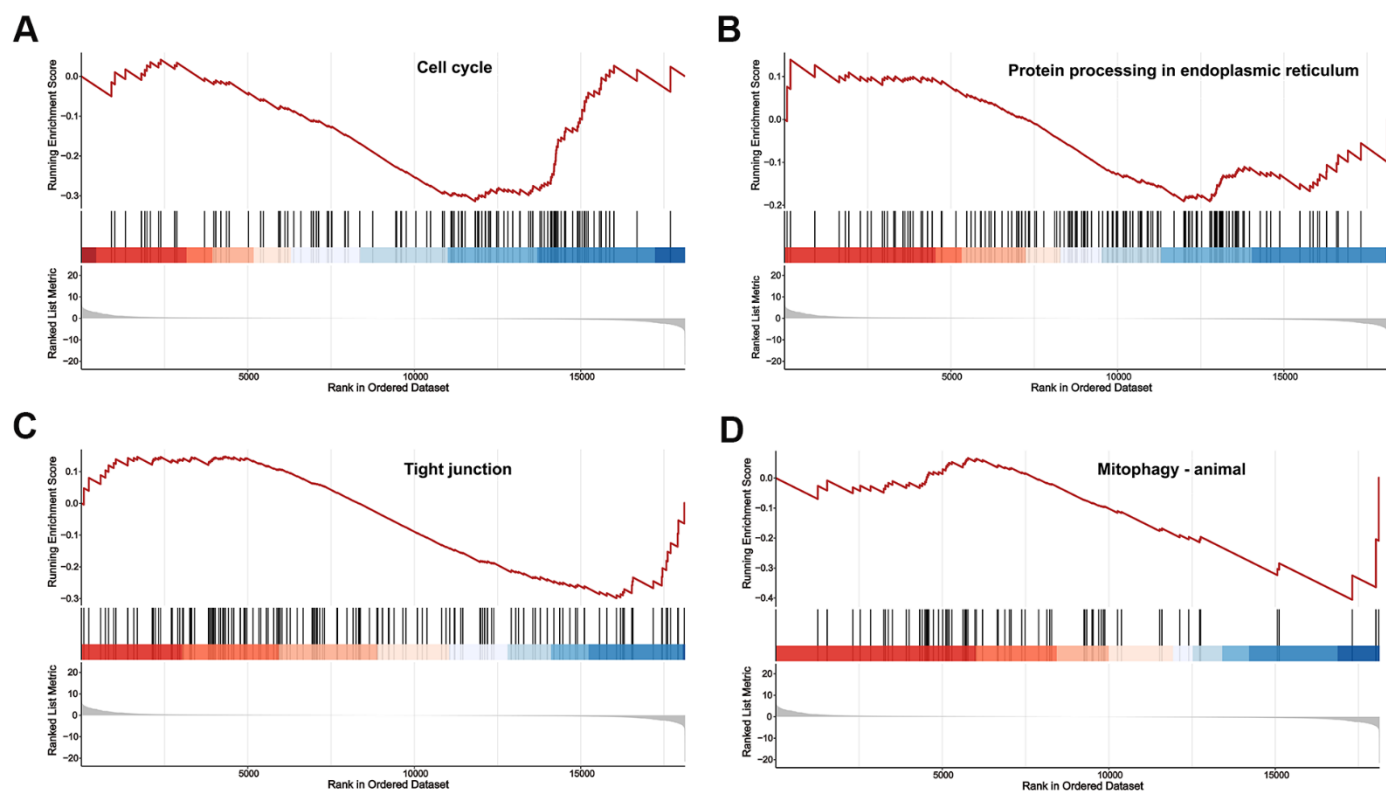

**Figure S2.** The GSEA of (A) cell cycle, (B) protein processing in endoplasmic reticulum, (C) tight junction, and (D) mitophagy-animal in HCT116 cells treated with AFB1.

**Table S1.** Summary of reads of MeRIP-seq and mRNA-seq in HCT116 cells with or without AFB1 treatment.

| Sample          | Raw reads  | Raw bases (G) | Clean reads | Clean bases (G) | Effective rate (%) | Q20 (%) | Q30 (%) |
|-----------------|------------|---------------|-------------|-----------------|--------------------|---------|---------|
| Control_1_IP    | 45,955,030 | 6.89          | 37,356,030  | 4.61            | 81.29              | 99.07   | 96.39   |
| Control_1_Input | 57,354,896 | 8.60          | 47,078,964  | 5.89            | 82.08              | 99.13   | 96.65   |
| Control_2_IP    | 72,201,732 | 10.83         | 59,867,556  | 7.38            | 82.92              | 99.09   | 96.46   |
| Control_2_Input | 57,813,808 | 8.67          | 46,979,252  | 6.14            | 81.26              | 99.04   | 96.31   |
| Control_3_IP    | 79,366,256 | 11.90         | 67,414,202  | 8.22            | 84.94              | 99.22   | 96.92   |
| Control_3_Input | 64,346,344 | 9.65          | 54,475,288  | 6.87            | 84.66              | 99.18   | 96.80   |
| AFB1_1_IP       | 66,338,140 | 9.95          | 56,452,100  | 7.03            | 85.10              | 99.17   | 96.75   |
| AFB1_1_Input    | 48,935,274 | 7.34          | 32,976,916  | 4.06            | 67.39              | 99.10   | 96.55   |
| AFB1_2_IP       | 72,110,258 | 10.82         | 62,770,108  | 7.99            | 87.05              | 99.34   | 97.31   |
| AFB1_2_Input    | 61,696,986 | 9.25          | 49,932,164  | 6.15            | 80.93              | 99.04   | 96.35   |
| AFB1_3_IP       | 71,026,356 | 10.65         | 58,153,984  | 7.23            | 81.88              | 99.08   | 96.45   |
| AFB1_3_Input    | 64,254,764 | 9.64          | 51,796,188  | 6.48            | 80.61              | 99.00   | 96.25   |

Q20 and Q30 refers to the percentage of nucleotides with Phred quality score >20 and >30, respectively.

**Table S2.** The mRNA expression levels of m6A regulators in AFB1-treated HCT116 cells.

| Gene             | Regulation | Base Mean | log2 Fold Change | <i>p</i> adj          | <i>p</i> value        |
|------------------|------------|-----------|------------------|-----------------------|-----------------------|
| <i>YTHDC1</i>    | reader     | 8183.29   | 0.2698           | $5.01 \times 10^{-2}$ | $1.28 \times 10^{-2}$ |
| <i>YTHDC2</i>    | reader     | 1240.49   | -0.2850          | $7.79 \times 10^{-2}$ | $2.25 \times 10^{-2}$ |
| <i>ZC3H13</i>    | writer     | 13,752.12 | 0.2560           | $1.07 \times 10^{-1}$ | $3.40 \times 10^{-2}$ |
| <i>FMR1</i>      | reader     | 2850.07   | 0.1846           | $1.84 \times 10^{-1}$ | $7.12 \times 10^{-2}$ |
| <i>HNRNPA2B1</i> | reader     | 40,454.61 | -0.1448          | $2.41 \times 10^{-1}$ | $1.03 \times 10^{-1}$ |
| <i>METTL14</i>   | writer     | 2843.99   | 0.1324           | $3.01 \times 10^{-1}$ | $1.41 \times 10^{-1}$ |
| <i>HNRNPC</i>    | reader     | 12,102.42 | 0.1168           | $3.10 \times 10^{-1}$ | $1.47 \times 10^{-1}$ |
| <i>FTO</i>       | eraser     | 1060.08   | -0.1201          | $3.61 \times 10^{-1}$ | $1.83 \times 10^{-1}$ |
| <i>YTHDF2</i>    | reader     | 3660.90   | 0.0777           | $4.07 \times 10^{-1}$ | $2.18 \times 10^{-1}$ |
| <i>METTL16</i>   | writer     | 1133.56   | -0.1061          | $4.64 \times 10^{-1}$ | $2.64 \times 10^{-1}$ |
| <i>IGF2BP2</i>   | reader     | 6558.11   | -0.0900          | $5.66 \times 10^{-1}$ | $3.58 \times 10^{-1}$ |
| <i>ALKBH5</i>    | eraser     | 3169.13   | -0.0906          | $5.91 \times 10^{-1}$ | $3.85 \times 10^{-1}$ |
| <i>RBM15</i>     | writer     | 1237.94   | -0.0983          | $6.89 \times 10^{-1}$ | $4.96 \times 10^{-1}$ |
| <i>IGF2BP1</i>   | reader     | 19.57     | -0.3703          | $7.07 \times 10^{-1}$ | $5.22 \times 10^{-1}$ |
| <i>METTL3</i>    | writer     | 1099.49   | 0.0409           | $7.86 \times 10^{-1}$ | $6.26 \times 10^{-1}$ |
| <i>CBLL1</i>     | writer     | 1211.29   | 0.0171           | $9.39 \times 10^{-1}$ | $8.79 \times 10^{-1}$ |
| <i>YTHDF1</i>    | reader     | 2315.30   | 0.0020           | $9.89 \times 10^{-1}$ | $9.77 \times 10^{-1}$ |
| <i>WTAP</i>      | writer     | 2420.62   | -0.0016          | $9.93 \times 10^{-1}$ | $9.83 \times 10^{-1}$ |
